# Supplementary material for: Insights into the programmed ketoreduction of partially reducing polyketide synthases: stereo- and substrate-specificity of the ketoreductase domain
Source: Royal Society of Chemistry journal article supplement (doi:10.1039/c4ob01777c), 2014-01-01

**Supporting Information**

**Insight into the Programmed Ketoreduction of Partially Reducing  
Polyketide Synthases: Stereo- and Substrate-Specificity of Ketoreductase  
Domain**

Ishin Soehano, Lifeng Yang, Feiqing Ding, Huihua Sun, Zhen Jie Low, Xuewei Liu, Zhao-  
Xun Liang\*

<sup>a</sup> Division of Structural Biology & Biochemistry, School of Biological Sciences,  
Nanyang Technological University, 60 Nanyang Drive, Singapore 637551; Tel: (+) 65  
6592 7736, Fax: (+) 65 6791 3856, E-mail: zxliang@ntu.edu.sg.

<sup>b</sup> Division of Chemistry and Biological Chemistry, School of Mathematics and Physics,  
Nanyang Technological University, 21 Nanyang Link, Singapore 637371,

**Table S1.** SACE3352 and homologous bacterial iPKSs.

| <b>Gene</b> | <b>Access no.</b> | <b>Organism</b>                                                      | <b>Identity%/Homology%</b> |
|-------------|-------------------|----------------------------------------------------------------------|----------------------------|
| NcsB        | AAM77986          | <i>Streptomyces carzinostaticus</i> subsp. <i>neocarzinostaticus</i> | 51/66                      |
| AziB        | ABY83164          | <i>Streptomyces sahachiroi</i>                                       | 48/64                      |
| PokM1       | ACN64831          | <i>Streptomyces diastatochromogenes</i>                              | 49/63                      |
| ChlB1       | AAZ77673          | <i>Streptomyces antibioticus</i>                                     | 46/61                      |
| MdpB        | ABY66019          | <i>Actinomadura madurae</i>                                          | 47/60                      |
| CalO5       | AAM70355          | <i>Micromonospora echinospora</i>                                    | 48/62                      |
| AviM        | AAK83194          | <i>Streptomyces viridochromogenes</i>                                | 48/61                      |

**TableS2. PCR primers used to generate double mutants KR<sub>SACE5532</sub>KR<sub>I2A</sub> and KR<sub>I2B</sub>, as well as quadruple mutant KR<sub>SACE5532</sub>KR<sub>I4</sub>. F, forward primer, R, reverse primer**

| KR <sub>SACE5532</sub> variants | Amino acid replacements                  | Primer sequences                                                                                                      |
|---------------------------------|------------------------------------------|-----------------------------------------------------------------------------------------------------------------------|
| KR <sub>I2A</sub>               | T1530→LT1<br>531→S                       | F: 5'-CCAGTTTGCCCGCCTGTCTGGCCAAGTCACCTATG -3'<br>R: 5'-CATAGGTGACTTGGCCAGACAGGCGGGCAAACCTGG -3'                       |
| KR <sub>I2B</sub>               | V1534→AT1<br>535→S                       | F: 5'-<br>ACGGGCCAAGCGAGCTATGCGGGCGGCGAACAGCTTTCTGGATG-3'<br>R: 5'-TTCGCCCGCCGCATAGCTCGCTTGGCCCCGTGGTGGGGCAAAC-<br>3' |
| KR <sub>I4</sub>                | T1530→LT1<br>531→S<br>V1534→AT1<br>535→S | F: 5'- CTGTCTGGCCAAGCAAGTTATGCGGGCGGCGAACAG-3'<br>R: 5'- CTGTTCCGCCCGCCGCATAACTTGCTTGGCCAGACAG-3'                     |

**TableS3. PCR Primers used to generate KR<sub>SACE5532</sub>KR<sub>III</sub>and KR<sub>SACE5532</sub>KR<sub>I4/II/III</sub>mutants.**

| Primer names     | Primer sequences                                                                                    |
|------------------|-----------------------------------------------------------------------------------------------------|
| Forward primer A | 5'-ACGTTTCATATGCGCGATCTGGCGTATGAAATCATTGGAAACCG-3'                                                  |
| Reverse primer B | 5'-ACGCGCTTTCGGAGCCAGGACTTCGCGCAGACCTTCCAGATCAA<br>CTTTATCAACCAGCGCATTGTTACACCAGCCCCGCGGCATGAACC-3' |
| Forward primer C | 5'-TGGTGAACAATGCGCTGGTTGATAAAGTTGATCTGGAAGGTCT<br>GCGCGAAGTCCTGGCTCCGAAAGCGCGTGGCGCGATGGC-3'        |
| Reverse primer D | 5'-AACAAACTCGAGGCCGGTATCGCCGCTCGCGGTCAGTTC-3'                                                       |

**Table S4. PCR Primers used to generate the SACE5532 variant KR<sub>I/II/III/IV</sub>.**

| Primer names     | Primer sequences                                         |
|------------------|----------------------------------------------------------|
| Forward primer A | 5'- TGCCGCGCGGCAGCCATATGAGCACCTATGCCGCGGTAAAG -3'        |
| Reverse primer B | 5'- AGGTCACGCGGGCGCAGCCATGGTGCCCGGAGCACCATCCAGAAC -3'    |
| Forward primer C | 5'- TGGCTGCGCCGCGTGACCTGGCTTACGAAATCATCTG -3'            |
| Reverse primer D | 5'- TCATCCGGACCCGTATCACCCGATGCGGTCAGTTC -3'              |
| Forward primer E | 5'- TGATACGGGTCCGGATGAAGGCCCGTCAATCGTGGAAG -3'           |
| Reverse primer F | 5'- TCAGTGGTGGTGGTGGTGGTGCTCGAGGCTCACTTTCGCTTTCAGCAG -3' |

**TableS5. Standalone ketoreductase (KR) domains and the amino acid replacements in KR<sub>SACE5532</sub> tested in this work.**

| KR names               | KR <sub>SACE5532</sub> amino acid replacement |                                                                                                                                                                                             |                                                                                                                         |                       |
|------------------------|-----------------------------------------------|---------------------------------------------------------------------------------------------------------------------------------------------------------------------------------------------|-------------------------------------------------------------------------------------------------------------------------|-----------------------|
|                        | Motif I<br>(red)                              | Motif II<br>(green)                                                                                                                                                                         | Motif III<br>(blue)                                                                                                     | Motif IV<br>(magenta) |
| KR <sub>SACE5532</sub> | Nil                                           | nil                                                                                                                                                                                         | nil                                                                                                                     | nil                   |
| KR <sub>I2A</sub>      | T1530→L, T1531→S                              | nil                                                                                                                                                                                         | nil                                                                                                                     | nil                   |
| KR <sub>I2B</sub>      | V1534→A, T1535→S                              | nil                                                                                                                                                                                         | nil                                                                                                                     | nil                   |
| KR <sub>I4</sub>       | T1530→L, T1531→S<br>V1534→A, T1535→S          | nil                                                                                                                                                                                         | nil                                                                                                                     | nil                   |
| KR <sub>II</sub>       | Nil                                           | M1564→T, L1567→R<br>N1568→G, T1569→L<br>A1572→S, A1573→S<br>S1574→N, E1576→D<br>S1577→T, S1578→T<br>A1580→F, R1583→N<br>A1584→S, N1585→R<br>I1587→L, D1588→E<br>G1589→A, F1590→V<br>T1591→S | nil                                                                                                                     | nil                   |
| KR <sub>III</sub>      | Nil                                           | nil                                                                                                                                                                                         | D1481→N, A1484→V<br>E1485→D, N1486→K,<br>M1487→V, T1489→L,<br>D1490→E, A1493→R,<br>R1494→E, T1495→V<br>M1496→L, S1497→A | nil                   |
| KR <sub>I2A/II</sub>   | T1530→L, T1531→S                              | M1564→T, L1567→R<br>N1568→G, T1569→L<br>A1572→S, A1573→S<br>S1574→N, E1576→D<br>S1577→T, S1578→T<br>A1580→F, R1583→N<br>A1584→S, N1585→R<br>I1587→L, D1588→E<br>G1589→A, F1590→V<br>T1591→S | nil                                                                                                                     | nil                   |
| KR <sub>I2B/II</sub>   | V1534→A, T1535→S                              | M1564→T, L1567→R<br>N1568→G, T1569→L<br>A1572→S, A1573→S<br>S1574→N, E1576→D<br>S1577→T, S1578→T<br>A1580→F, R1583→N<br>A1584→S, N1585→R<br>I1587→L, D1588→E<br>G1589→A, F1590→V<br>T1591→S | nil                                                                                                                     | nil                   |
| KR <sub>I4/II</sub>    | T1530→L, T1531→S<br>V1534→A, T1535→S          | M1564→T, L1567→R<br>N1568→G, T1569→L<br>A1572→S, A1573→S<br>S1574→N, E1576→D<br>S1577→T, S1578→T<br>A1580→F, R1583→N<br>A1584→S, N1585→R<br>I1587→L, D1588→E<br>G1589→A, F1590→V            | nil                                                                                                                     | nil                   |

|                         |                                                  |                                                                                                                                                                                             |                                                                                                                         |                                                                                                                                                                           |
|-------------------------|--------------------------------------------------|---------------------------------------------------------------------------------------------------------------------------------------------------------------------------------------------|-------------------------------------------------------------------------------------------------------------------------|---------------------------------------------------------------------------------------------------------------------------------------------------------------------------|
|                         |                                                  | T1591→S                                                                                                                                                                                     |                                                                                                                         |                                                                                                                                                                           |
| KR <sub>I4/II/III</sub> | T1530→L, T1531→S<br>V1534→A, T1535→S             | M1564→T, L1567→R<br>N1568→G, T1569→L<br>A1572→S, A1573→S<br>S1574→N, E1576→D<br>S1577→T, S1578→T<br>A1580→F, R1583→N<br>A1584→S, N1585→R<br>I1587→L, D1588→E<br>G1589→A, F1590→V<br>T1591→S | D1481→N, A1484→V<br>E1485→D, N1486→K,<br>M1487→V, T1489→L,<br>D1490→E, A1493→R,<br>R1494→E, T1495→V<br>M1496→L, S1497→A | nil                                                                                                                                                                       |
| KR <sub>VI/III/IV</sub> | S1524→C,<br>T1530→L, T1531→S<br>V1534→A, T1535→S | M1564→T, L1567→R<br>N1568→G, T1569→L<br>A1572→S, A1573→S<br>S1574→N, E1576→D<br>S1577→T, S1578→T<br>A1580→F, R1583→N<br>A1584→S, N1585→R<br>I1587→L, D1588→E<br>G1589→A, F1590→V<br>T1591→S | D1481→N, A1484→V<br>E1485→D, N1486→K,<br>M1487→V, T1489→L,<br>D1490→E, A1493→R,<br>R1494→E, T1495→V<br>M1496→L, S1497→A | I1387→L,<br>Q1390→E<br>G1397→D,<br>N1409→R,<br>G1410→A<br>P1413→N,<br>H1415→T<br>D1418→P,<br>T1424→E<br>T1427→R,<br>E1430→D<br>A1431→G,<br>R1433→L<br>S1434→A,<br>Y1437→A |
| KR <sub>NcsB</sub>      | Nil                                              | nil                                                                                                                                                                                         | nil                                                                                                                     | nil                                                                                                                                                                       |

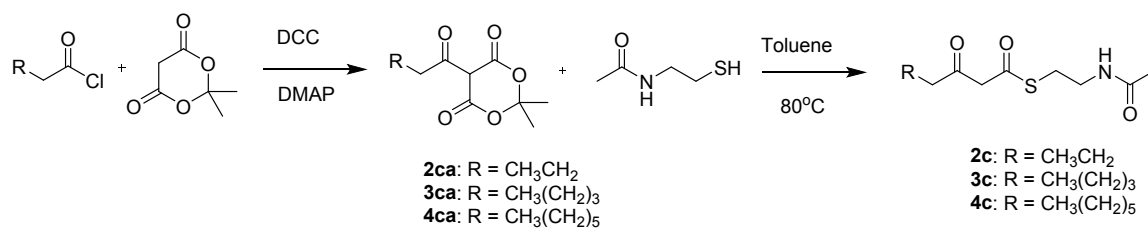

**Scheme S1.** General Procedures for synthesis of compounds **2c**, **3c** and **4c**.

**Figure S1.** Sequence alignment of KR<sub>SACE5532</sub> and KR<sub>NcsB</sub> with a sequence identity of 45% and sequence homology of 63%. The four motifs discussed in the main text are highlighted.

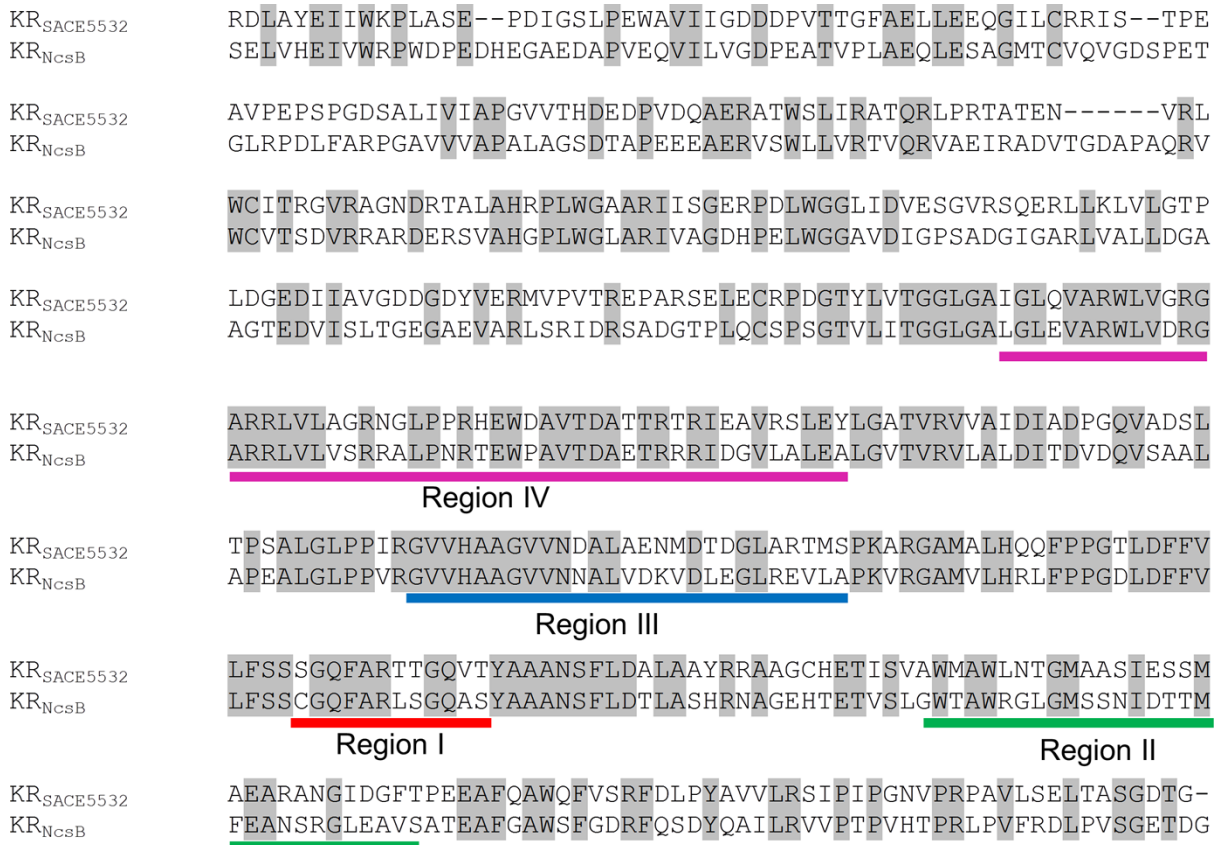

**Figure S2.** Multiple sequence alignment of the KR domains of selected type I partially reducing polyketide synthases and modular polyketide synthases. The conserved residues were highlighted with red color.

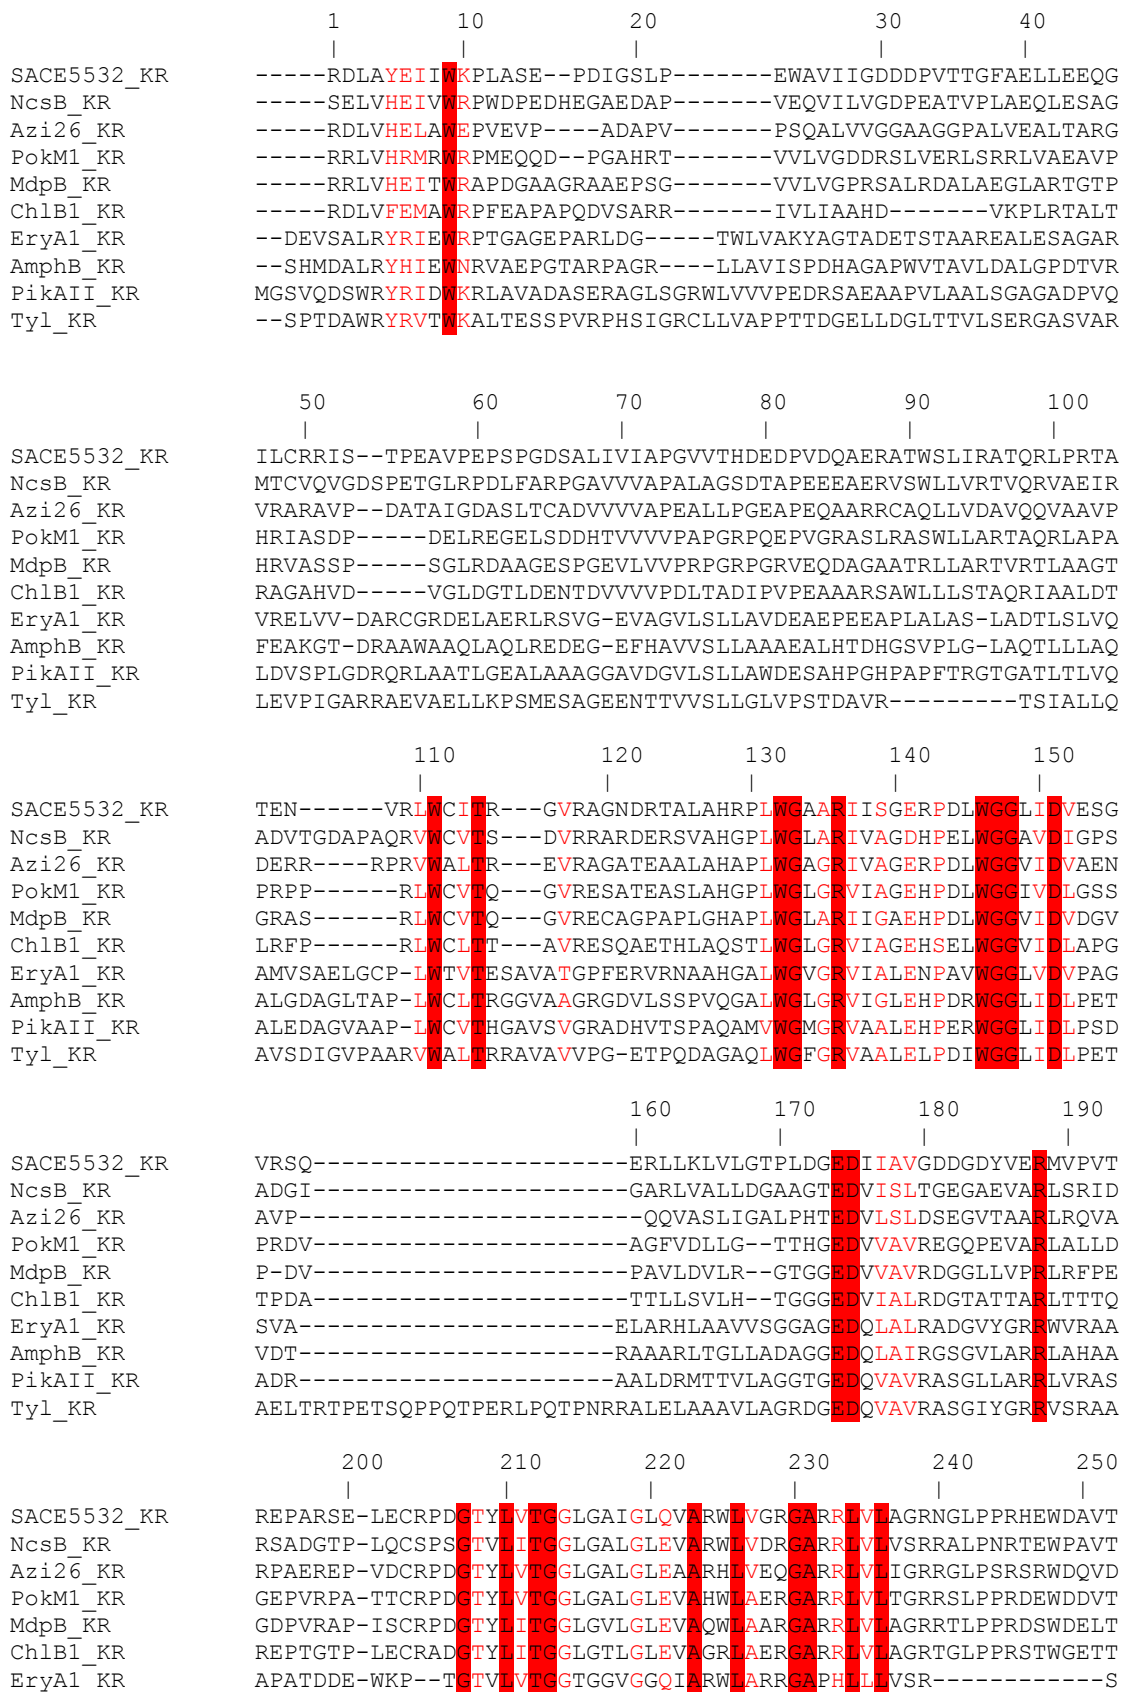

```

AmphB_KR      PAVPGSG-KRPPVHGSVIVTGGTGGIGGRVARRAEQGAHVITSR-----R
PikAII_KR     LPAHGTSPPWQADGTVLVTGAEPPAAEAARRLARDGAGHLLHTTPSG-SEGAEGTSG
Tyl_KR        AAG----AASWQPSGTVLITGGMGAIGRRLARRLAAEGAERLVLTSR-----R
                260       270       280       290       300       310
                |         |         |         |         |         |
SACE5532_KR   DATTRTRIEAVRSLEYLGGATVRVVAIDIDADPGQVADSLTPSALGLFPPIRGVVHAAGVVND
NcsB_KR       DAETRRRIDGVLALAEALGVTVRVVALDITDQVQVSAALAPEALGLFPVVRGVVHAAGVVNN
Azi26_KR      DPAAVAQIAEVVAIEAAGATVRVLSLDISDAEATARALDPGALDMPVVRGIVHCAGVSD
PokM1_KR      DPLVRSRVEAVRSIERLGGSTVVTVALDLADADAAEKLSPALGLFPVVRGVVHAAGVLD
MdpB_KR       DPADVAVRAIRSLERLGGTVVVVTVDVADAETAGKLLSPAALGLFPPIRGVVHAAGVVND
ChlB1_KR      DTHTRQRIEAVKALDQGVTVRVIPLDITDTAKAAEQQLTPDALGLFPPIRGIVHLAGVLDN
EryA1_KR     GPDADGAGELVAELAEALGARTVAACDVTDRESVRELLGGIGDDVLSAVFHAA-ATLDD
AmphB_KR     GADAPGAAELRAELEQLGVRVTIACDAADREALAALLAELPEDAPLTAVFHSAGVAHDD
PikAII_KR    AAEDSGLAGLVAELADLGATATVVTCDLTDAAAARLLAGVSDAHELSAVLHLP-PTVDS
Tyl_KR       GPEAPGAAELAEELRGHGCEVVHAACDVAERDALAALVT---AYEPNAVFTA-GILDD
                320       330       340       350       360
                |         |         |         |         |
SACE5532_KR   ALAENMDTDGLARTMSPKARGAMALHQQFPPGTLD-----FVLFSSSGQFARTTGQVTY
NcsB_KR       ALVDKVDLEGLREVLPKVRGAMVLRHRLFPFGDL-----FVLFSSCGQFARLSGQASY
Azi26_KR      ALVEKTGAANLDTTMGPKADGAMVLRHRLFPAGTL-----FVTFSSCGQLARLTGQVSY
PokM1_KR      RPLRALDEDSLRAVLRPKAEGAVVLRHQLFPPGSLD-----FVLFSSCGQLLGLPGQSSY
MdpB_KR       RLLRDLDGESLRAVQRPKIGGALVLRHSLFPPGEPD-----FVLFSSCGQLLGLPGQAY
ChlB1_KR      RMVTAVDETSLRTVLRPKADGAWTLHHTLFPFGTID-----FLILFSSCGQLLGLPGQAY
EryA1_KR     GTVDTLTGERIERASRAKVLGARNLHELTRDLT-----AFVLFSSFASAFGAPGLGGY
AmphB_KR     APVADLTGQLDALMRAKLTAARHLHELTDLDD-----AFVLFSSGAAVWGSQPGY
PikAII_KR    EPLAATDADALARVVTAKATAALHLDRLLREAAAAGRPPVLVLFSSVAAIWGGAGQGY
Tyl_KR       AVIDTLSPESFETVRGAKVCGAELHQLTADIKGLD----AFVLFSSVTGTWGNAGQGY
                370       380       390       400       410       420
                |         |         |         |         |         |
SACE5532_KR   AAANSFLDALAYRRAAG--CHETISVAMMNLNTGMAAS-IESSMAEARANGIDGFTPE
NcsB_KR       AAANSFLDTLASHRNAGE--HTEVSLGWTAWRGLGMSSN-IDTTFEANSRGLAVSAT
Azi26_KR      ASANSFLDALAALRRSRG--ETGTSFAMAQWIRGRMGETTGRATILEAESRGLGGITVS
PokM1_KR      AAGNAFLDALAAHGAAG--DTGTVSFGWTSWRGLGMSTSSSEVIDAELA-AHETADISAL
MdpB_KR       AASNAFLDGLAAHRNAG--DTGTISFGWTSWRGLGMSRSSAVIDEELA-ARGTADISRA
ChlB1_KR     GSANAFLDALAVHRNTPPTAADDTSFGWTSWRGQGMVN-DVVDALR-ARGVDTITQ
EryA1_KR     APGNAYLDGLAQRRSDG---LPATAVAVGTWAGSGMAEG-AVADRFR--HCVIEMPE
AmphB_KR     AAANAYLDALAEHRRLG---LTASSVAVGTWGEVGMATDPEVHDLRVR--QVFLAMEPE
PikAII_KR    AAGTAFLDALAGQHRADG---PTVTSVAWSPWEGSRVTEG-ATGERLRR--LGLRPLAPA
Tyl_KR       AAANAALDALAERRRAAG---LPATSVAVGLWGGGMAAG-AGEESLSR--RCLRAMDPD
                430       440       450       460
                |         |         |         |
SACE5532_KR   EAFQAWQFVSRFD-----LPYAVVLRSIPIPGNVPRPAVLSLTLASGDTG-----
NcsB_KR       EAFGAWSFGRFQ-----SDYQAILRVVPTPVHTPRLPVFRDLPVSGETDG-----
Azi26_KR     EALRSWAYADRFA-----LPYAAVMRVMPD----HTLPVFSHLSVTDAG-----
PokM1_KR     EAFASWELADRYG-----LGAAVLRITLPPPEPQRRLLPGLGVPPTDAPH-----
MdpB_KR      EAFQAWELAERYD-----LGAAVLRITLPLDPGRRRPLFDDLPAPAA-----
ChlB1_KR     EAFAAWDFAAQH-----PGNYVLRRLPHEPMDQLLSEIHHTGPT-----
EryA1_KR     TACRALQNALDRAEVCPIVIDVRWDRFLAYTAQRPTRLFDEIDAR-----
AmphB_KR     HALGALDQMLENDDTAAAITLMDWEMFAPAFATANRPSALLSTVPEAVSALS-----
PikAII_KR    TALTALDTALGHGDTAVTIADVWSSFAPGFTTARPGTLLADLPEARRALDEQQST
Tyl_KR       AAVDALLGAMGRNDVCVTVVDVWDFAPATNAIRPGRLFDTVPEAREALT-----
                |         |         |         |
SACE5532_KR   DIADPGQVADSLTPSALGLFPPIRGVVHAAGVVND.....FSSSGQFARTTGQVTY
NcsB_KR       DITDQVQVSAALAPEALGLFPVVRGVVHAAGVVNN.....FSSCGQFARLSGQASY
Azi26_KR     DISDAEATARALDPGALDMPVVRGIVHCAGVSD.....FSSCGQLARLTGQVSY
PokM1_KR     DLADADAAEKLSPALGLFPVVRGVVHAAGVLD.....FSSCGQLLGLPGQSSY
MdpB_KR      DVADAETAGKLLSPAALGLFPPIRGVVHAAGVVND.....FSSCGQLLGLPGQAY
ChlB1_KR     DITDTAKAAEQQLTPDALGLFPPIRGIVHLAGVLDN.....FSSCGQLLGLPGQAY
Ery_KR1     DVTDRESVRELLGGIGDDVLSAVFHAA-ATLDD.....FSSFASAFGAPGLGGY
Amp_KR1     DAADREALAALLAELPEDAPLTAVFHSAGVAHDD.....FSSGAAVWGSQPGY
Pik_KR1     DLTDAAAARLLAGVSDAHELSAVLHLP-PTVDS.....FSSVAAIWGGAGQGY
Tyl_KR1     DVAERDALAALVT---AYEPNAVFTA-GILDD.....FSSVTGTWGNAGQGY

```



**Fig. S3.**  $^1\text{H}$  and  $^{13}\text{C}$  NMR spectra of SNAC substrates **2c**, **3c** and **4c**.

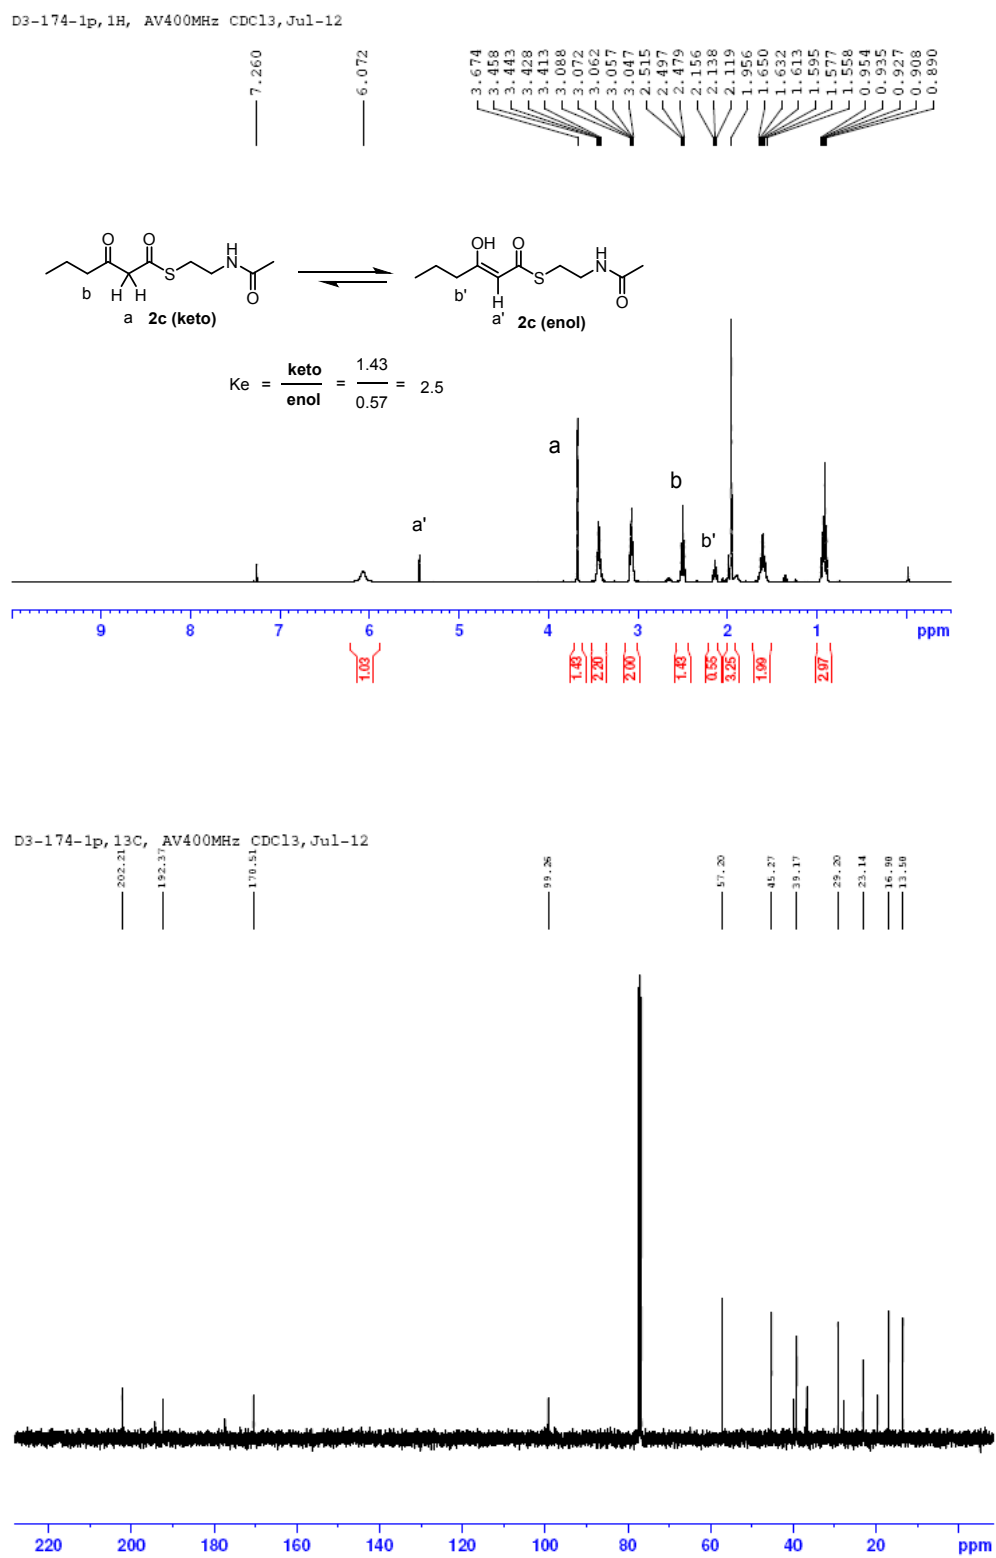

D3-194-1p, 1H, AV400MHz CDCl3, Aug-12

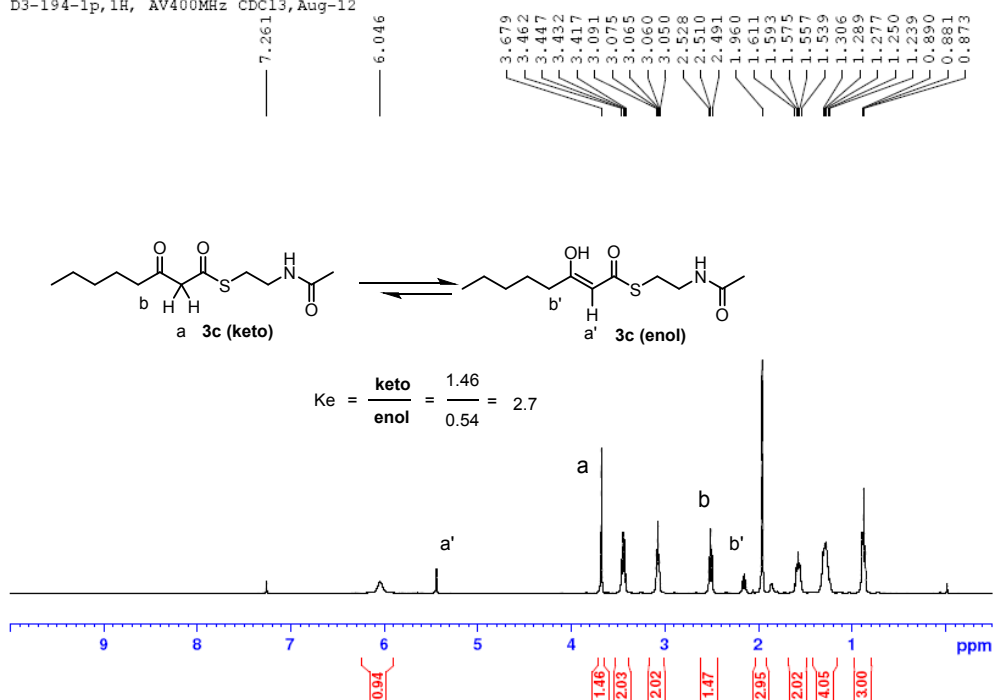

D3-194-1p, 13C, AV400MHz CDCl3, Aug-12

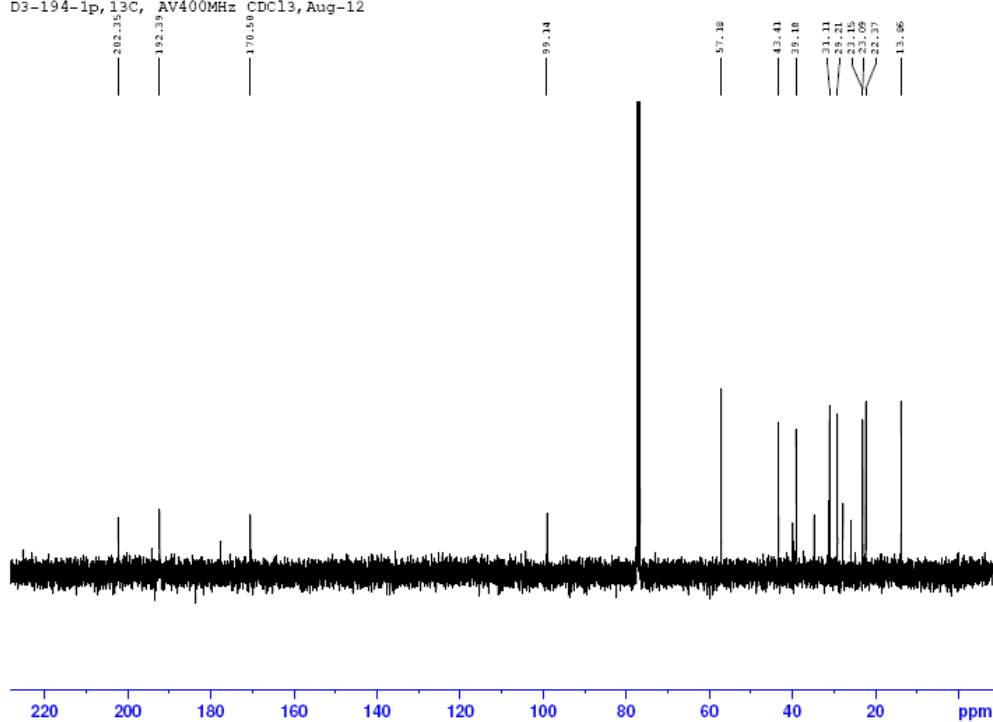

D3-198-1p, 1H, AV400MHz CDCl3, Aug-12

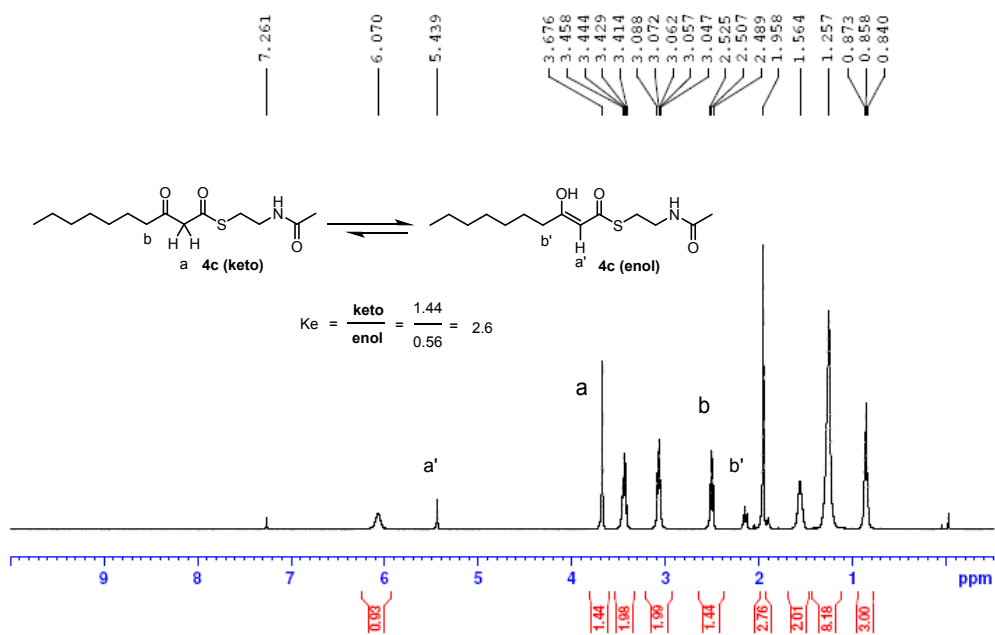

D3-198-1p, 13C, AV400MHz CDCl3, Aug-12

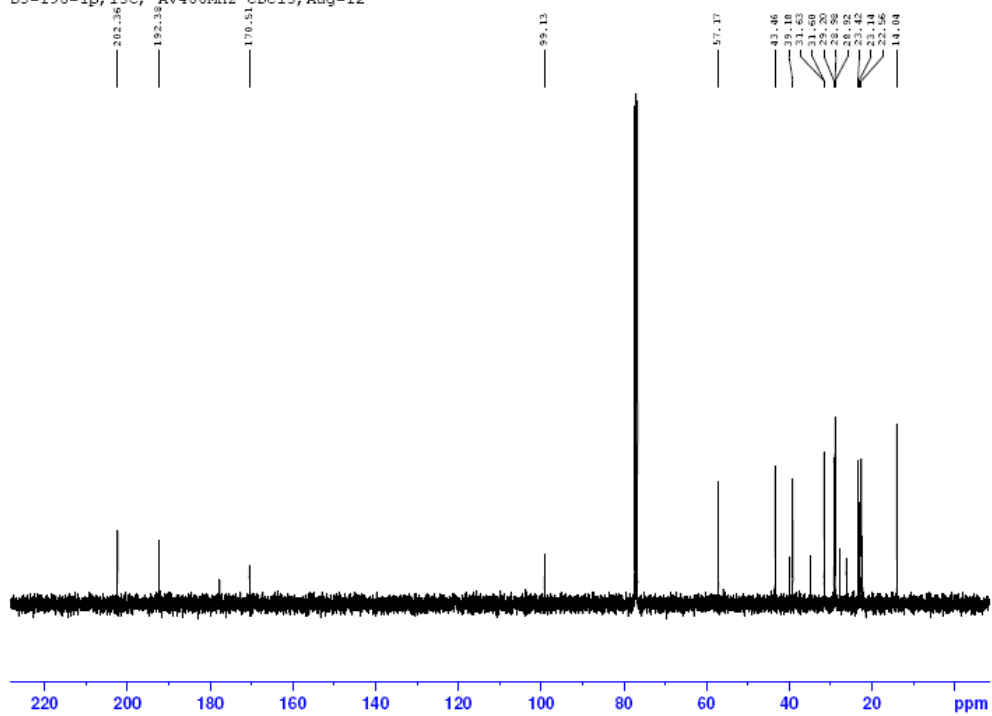

Supplement: c4ob01777c1.pdf [file c4ob01777c1.pdf]
